# Supplementary material for: Mortality Risk from Respiratory Diseases Due to Non-Optimal Temperature among Brazilian Elderlies
Source: MDPI journal article supplement (doi:10.3390/ijerph18115550), 2021-05-22
Supplement: s1 [file s1]

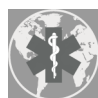

## Supplementary Materials

**Table S1.** Total attributable fraction (AF) of mortality (%), according to model adjustment, by capital cities and the entire Brazil, from 2000 to 2017.

| Cities         | Natural Spline,<br>City-Specific Degrees of Freedom |                 | Natural Spline,<br>Fixed Degrees of Freedom<br>(df = 4) |                 | B-Spline,<br>City-Specific Degrees of<br>Freedom |                 | B-Spline,<br>Fixed Degrees of Freedom<br>(df = 4) |                 |
|----------------|-----------------------------------------------------|-----------------|---------------------------------------------------------|-----------------|--------------------------------------------------|-----------------|---------------------------------------------------|-----------------|
|                | AF%                                                 | (95% IC)        | AF%                                                     | (95% IC)        | AF%                                              | (95% IC)        | AF%                                               | (95% IC)        |
| Midwest        |                                                     |                 |                                                         |                 |                                                  |                 |                                                   |                 |
| Brasília       | 6.02                                                | (1.56, 10.09)   | 6.33                                                    | (2.91, 9.24)    | 5.37                                             | (−0.59, 10.56)  | 5.18                                              | (−0.69, 9.93)   |
| Campo Grande   | 6.84                                                | (−5.48, 16.66)  | 5.77                                                    | (−3.59, 12.82)  | 3.75                                             | (−1.71, 7.88)   | 10.24                                             | (−1.63, 20.59)  |
| Cuiabá         | 10.69                                               | (−5.56, 22.69)  | 4.26                                                    | (−0.87, 8.79)   | 8.69                                             | (−6.9, 20.43)   | 4.41                                              | (−0.16, 7.9)    |
| Goiânia        | 8.08                                                | (3.47, 12.76)   | 5.60                                                    | (1.21, 10.15)   | 6.79                                             | (2.82, 10.37)   | 3.67                                              | (−0.41, 7.24)   |
| North          |                                                     |                 |                                                         |                 |                                                  |                 |                                                   |                 |
| Belém          | 10.06                                               | (−18.81, 29.89) | 5.07                                                    | (−23.68, 26.09) | 11.40                                            | (−12.07, 29.25) | 4.94                                              | (−0.87, 9.88)   |
| Boa Vista      | 3.55                                                | (−5.85, 11.54)  | 4.08                                                    | (−4.49, 11.45)  | 9.61                                             | (−21.62, 30.13) | 5.20                                              | (−4.6, 13.41)   |
| Macapá         | 5.15                                                | (−0.42, 10.77)  | 2.31                                                    | (−34.57, 29.9)  | 19.66                                            | (2.35, 31.76)   | 12.40                                             | (−13.9, 31.9)   |
| Manaus         | 4.55                                                | (−2.50, 10.8)   | 2.96                                                    | (−1.07, 6.47)   | 9.16                                             | (1.4, 15.25)    | 7.39                                              | (0.94, 12.97)   |
| Palmas         | 4.12                                                | (−3.30, 10.84)  | 3.47                                                    | (−3.23, 8.66)   | 4.81                                             | (−5.51, 13.37)  | 5.09                                              | (−4.55, 12.39)  |
| Porto Velho    | 5.11                                                | (−4.64, 13.45)  | 5.63                                                    | (−0.92, 10.36)  | 8.63                                             | (−4.36, 18.71)  | 7.47                                              | (−3.41, 15.25)  |
| Rio Branco     | 2.73                                                | (−1.68, 6.37)   | 12.22                                                   | (−8.13, 28.09)  | 3.37                                             | (−5.58, 9.93)   | 15.07                                             | (−2.98, 28.96)  |
| Northeast      |                                                     |                 |                                                         |                 |                                                  |                 |                                                   |                 |
| Aracajú        | 14.55                                               | (−9.66, 33.21)  | 9.50                                                    | (−26.98, 34.1)  | 12.81                                            | (−9.18, 29.93)  | 2.63                                              | (−28.96, 25.66) |
| Fortaleza      | 2.91                                                | (−2.55, 7.63)   | 4.09                                                    | (−2.32, 9.66)   | 4.58                                             | (−1.4, 10.43)   | 7.09                                              | (−7.29, 19.95)  |
| João Pessoa    | 22.95                                               | (8.94, 34.16)   | 15.89                                                   | (−0.04, 29.25)  | 23.49                                            | (6.79, 36.07)   | 12.95                                             | (0.39, 22.12)   |
| Maceió         | 11.53                                               | (−6.16, 25.75)  | 11.74                                                   | (−6.13, 24.76)  | 13.68                                            | (1.72, 23.26)   | 8.89                                              | (−3.78, 20.2)   |
| Natal          | 9.3                                                 | (−7.37, 22.18)  | 11.01                                                   | (−7.97, 25.6)   | 9.25                                             | (3.12, 14.63)   | 5.25                                              | (−4.3, 13.55)   |
| Recife         | 4.96                                                | (0.54, 8.81)    | 9.03                                                    | (−16.83, 28.85) | 7.22                                             | (−22.29, 28.09) | 18.66                                             | (−0.76, 36.43)  |
| Salvador       | 15.25                                               | (5.04, 24.57)   | 14.76                                                   | (2.74, 24.23)   | 13.54                                            | (−0.37, 24.81)  | 15.65                                             | (2.87, 27.09)   |
| São Luís       | 12.86                                               | (−3.51, 25.64)  | 13.32                                                   | (−3.66, 26.57)  | 10.10                                            | (−2.44, 20.58)  | 11.01                                             | (−1.68, 22.91)  |
| Teresina       | 6.85                                                | (−2.11, 14.35)  | 6.34                                                    | (−44.95, 38.8)  | 14.47                                            | (−19.96, 36.86) | 16.85                                             | (−18.94, 38.79) |
| South          |                                                     |                 |                                                         |                 |                                                  |                 |                                                   |                 |
| Curitiba       | 9.8                                                 | (−4.12, 21.13)  | 8.87                                                    | (−6.79, 21.7)   | 15.93                                            | (1.68, 27.88)   | 13.10                                             | (−0.34, 24.73)  |
| Florianópolis  | 11.24                                               | (−0.58, 22.22)  | 7.20                                                    | (2.94, 10.18)   | 10.18                                            | (−1.56, 19.37)  | 4.97                                              | (3.13, 6.17)    |
| Porto Alegre   | 16.36                                               | (4.41, 26.63)   | 13.54                                                   | (−0.54, 24.81)  | 13.40                                            | (1.59, 23.83)   | 10.11                                             | (−4.79, 22.5)   |
| Southeast      |                                                     |                 |                                                         |                 |                                                  |                 |                                                   |                 |
| Belo Horizonte | 3.7                                                 | (−1.20, 8.01)   | 4.55                                                    | (1.31, 7.68)    | 2.13                                             | (−5.31, 8.88)   | 3.22                                              | (−0.61, 6.57)   |
| Rio de Janeiro | 7.91                                                | (4.56, 10.99)   | 5.72                                                    | (3.72, 7.57)    | 6.74                                             | (3.87, 9.31)    | 5.24                                              | (2.7, 7.51)     |
| São Paulo      | 4.99                                                | (1.07, 8.59)    | 3.81                                                    | (1.12, 6.37)    | 8.42                                             | (−1.72, 16.85)  | 4.24                                              | (−3.79, 11.52)  |
| Vitória        | 4.71                                                | (−4.75, 12.65)  | 2.72                                                    | (−0.87, 5.65)   | 6.08                                             | (−6.89, 16.81)  | 3.10                                              | (−4.18, 8.58)   |
| Brazil         | 7.54                                                | (5.36, 9.21)    | 6.37                                                    | (4.14, 8.05)    | 8.56                                             | (5.15, 11.23)   | 6.9                                               | (3.88, 9.35)    |

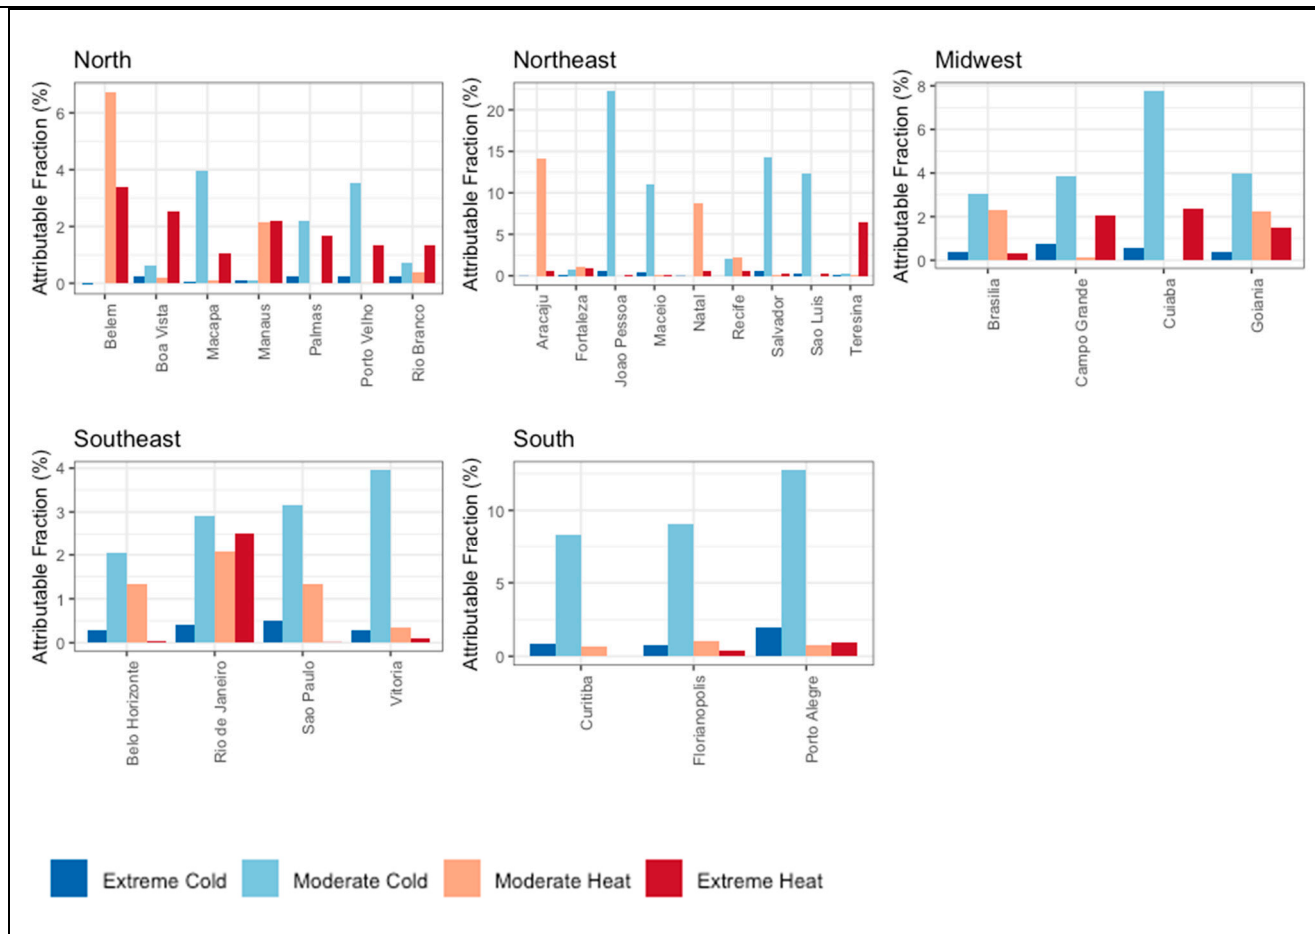

Figure S1. Moderate and extreme attributable fraction of mortality (%). Brazil, 2000 to 2017.

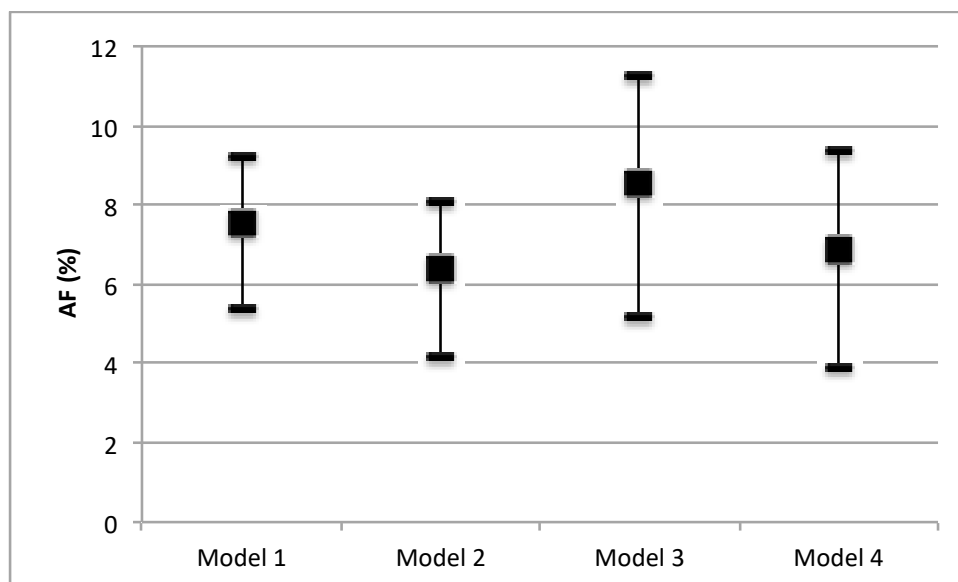

Figure S2. Total attributable fraction (AF) of mortality (%) according to model adjustment. Brazil, 2000 to 2017. Note: Model 1: Natural spline for exposure and city-specific degree of freedom for trend and seasonality; Model 2: Natural spline for exposure and four degrees of freedom for trend and seasonality; Model 3: quadratic B-spline for exposure and city-specific degree of freedom for trend and seasonality; Model 4: quadratic B-spline for exposure and four degree of freedom for trend and seasonality.
